# Supplementary material for: Non-toxic engineered carbon nanodiamond concentrations induce oxidative/nitrosative stress, imbalance of energy metabolism, and mitochondrial dysfunction in microglial and alveolar basal epithelial cells
Source: PubMed Central journal article supplement (PMC5833425; doi:10.1038/s41419-018-0280-z), 2018-02-14
Supplement: 41419_2018_280_MOESM2_ESM.pdf [file 41419_2018_280_MOESM2_ESM.pdf]

A

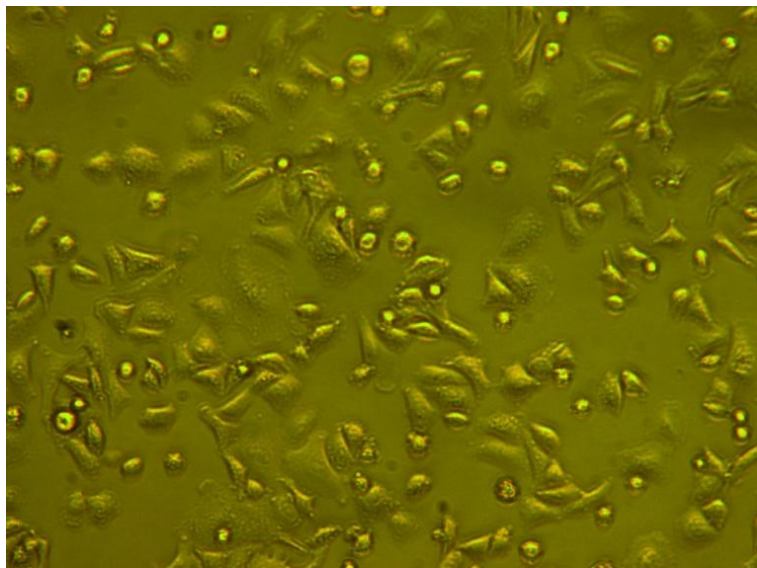

A549 cells – Low density

B

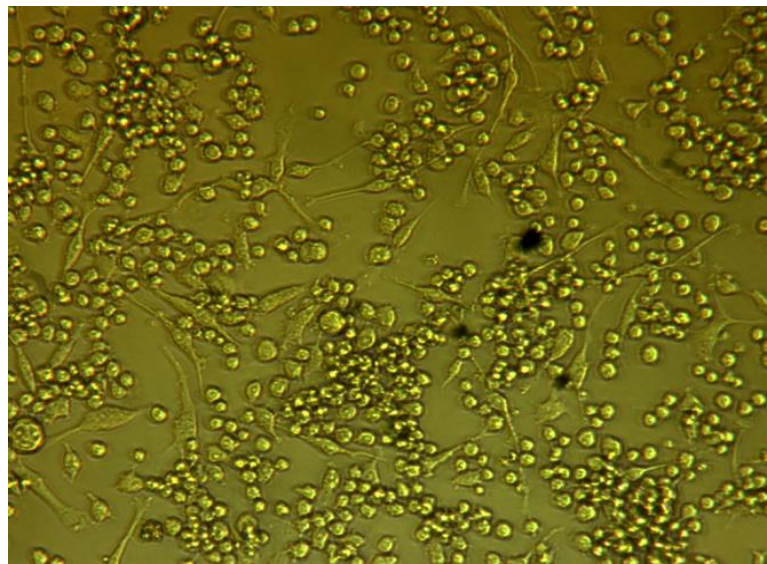

BV-2 cells – Low density

C

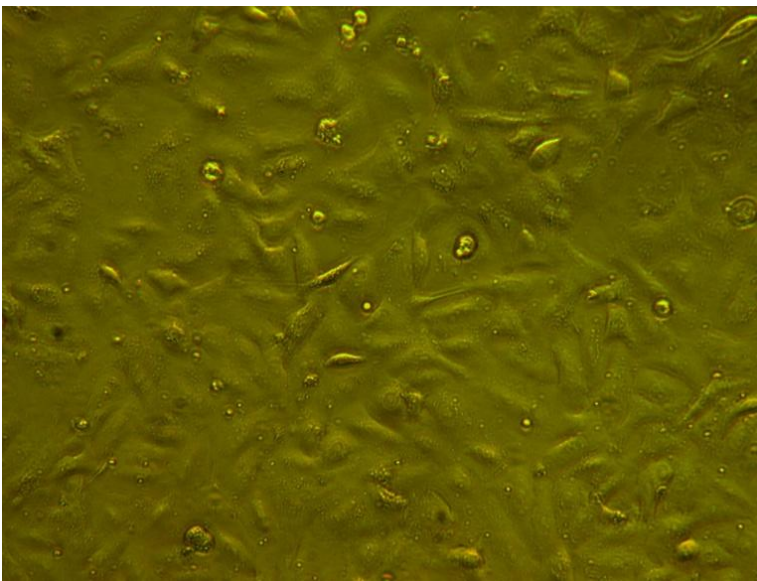

A549 cells – High density

D

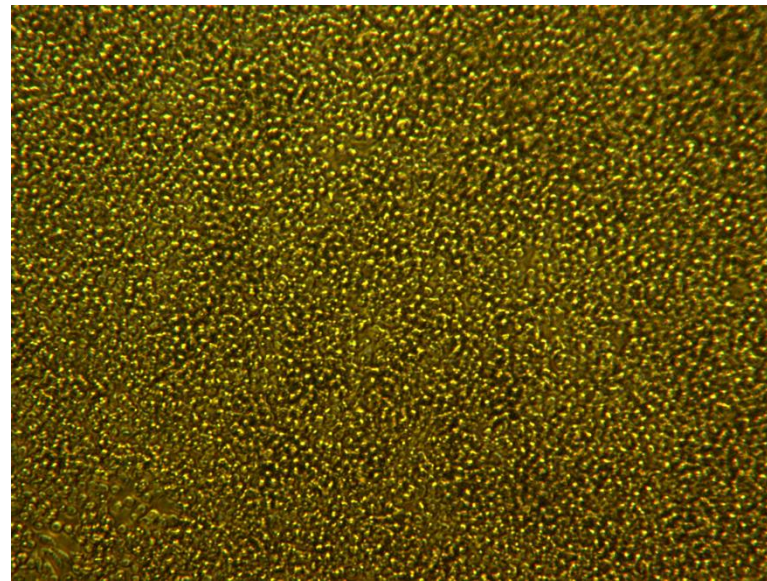

BV-2 cells – High density
