# Supplementary material for: Non-toxic engineered carbon nanodiamond concentrations induce oxidative/nitrosative stress, imbalance of energy metabolism, and mitochondrial dysfunction in microglial and alveolar basal epithelial cells
Source: PubMed Central journal article supplement (PMC5833425; doi:10.1038/s41419-018-0280-z), 2018-02-14

Panel A

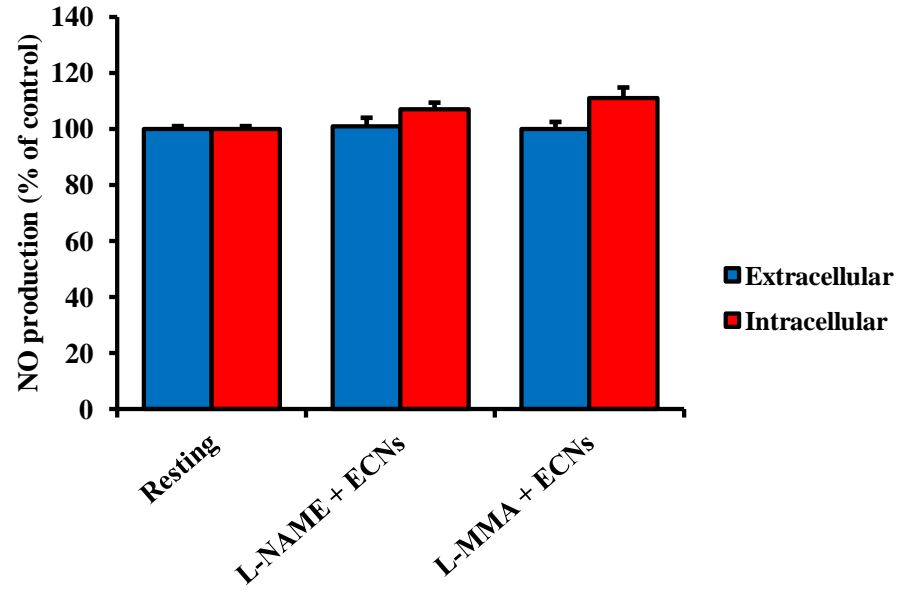

Panel B

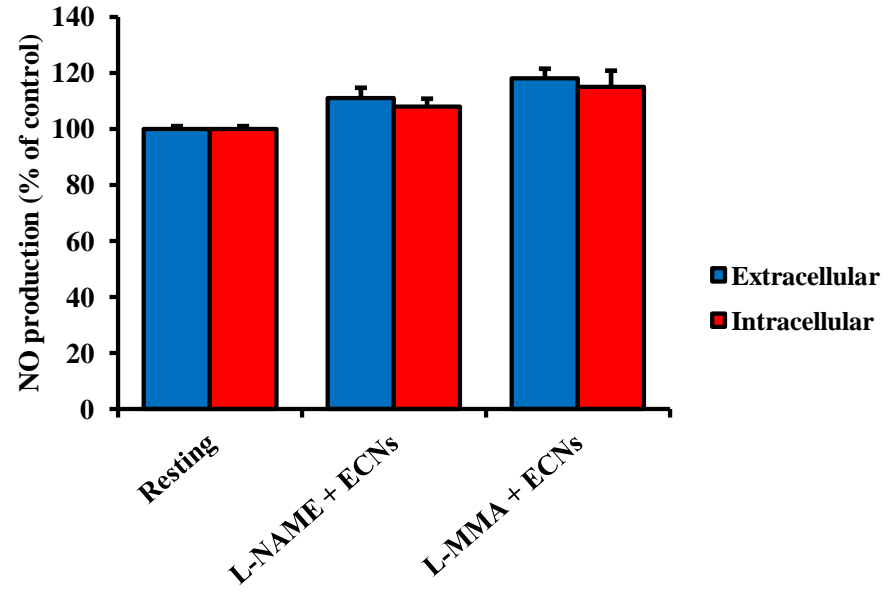

Supplement: 41419_2018_280_MOESM5_ESM.pdf [file 41419_2018_280_MOESM5_ESM.pdf]
