# Supplementary material for: Non-toxic engineered carbon nanodiamond concentrations induce oxidative/nitrosative stress, imbalance of energy metabolism, and mitochondrial dysfunction in microglial and alveolar basal epithelial cells
Source: PubMed Central journal article supplement (PMC5833425; doi:10.1038/s41419-018-0280-z), 2018-02-14
Supplement: 41419_2018_280_MOESM6_ESM.pdf [file 41419_2018_280_MOESM6_ESM.pdf]

**Supplementary Table 1.** Effect of 24 hours of incubation of alveolar basal epithelial A549 and microglial BV-2 cells with 2  $\mu\text{g/ml}$  of engineered carbon nanodiamonds (ECNs) on cell proliferation.

| <b>% of proliferation compared to resting cells</b> |                          |
|-----------------------------------------------------|--------------------------|
| <b>A549 ECNs-treated</b>                            | <b>BV-2 ECNs-treated</b> |
| 93.23<br>(5.95)                                     | 92.10<br>(5.12)          |

Values are the mean of four different experiments. Standard deviations are in parenthesis.
