# Supplementary material for: Non-toxic engineered carbon nanodiamond concentrations induce oxidative/nitrosative stress, imbalance of energy metabolism, and mitochondrial dysfunction in microglial and alveolar basal epithelial cells
Source: PubMed Central journal article supplement (PMC5833425; doi:10.1038/s41419-018-0280-z), 2018-02-14
Supplement: 41419_2018_280_MOESM7_ESM.pdf [file 41419_2018_280_MOESM7_ESM.pdf]

**Supplementary Table 2.** Effect of 24 hours of incubation of alveolar basal epithelial A549 and microglial BV-2 cells with 2  $\mu\text{g/ml}$  of engineered carbon nanodiamonds (ECNs) on cell death.

| <b>% of cell death</b> |                |                |                |
|------------------------|----------------|----------------|----------------|
| <b>A549</b>            |                | <b>BV-2</b>    |                |
| Resting                | ECNs           | Resting        | ECNs           |
| 1.52<br>(0.39)         | 2.70<br>(0.45) | 2.21<br>(1.82) | 2.76<br>(1.20) |

Values are the mean of four different experiments. Standard deviations are in parenthesis.
